# Supplementary material for: Ternary-structured graphite carbon nitride quantum dots/TiO2 nanotubes/3D SiO2 photonic crystals for enhanced dye photodegradation
Source: Royal Society of Chemistry journal article supplement (doi:10.1039/d3nj00580a), 2023-01-01
Supplement: d3nj00580a5.pdf [file d3nj00580a5.pdf]

## Supporting information

### Ternary-Structured Graphite Carbon Nitride Quantum Dots/TiO<sub>2</sub> Nanotubes/3D SiO<sub>2</sub> Photonic Crystals for Enhanced Dye Photodegradation

Ping Li,<sup>ac</sup> Huaiyuan Jiang,<sup>ac</sup> Qing Wang,<sup>a</sup> Ruizhen Liu,<sup>ab</sup> Yutian Fan,<sup>ac</sup> Ru'an Chi,<sup>ac</sup> Jian Cheng<sup>a</sup> and Renliang Lyu<sup>\*ac</sup>

- Key Laboratory for Green Chemical Engineering process of Ministry of Education, Key Laboratory of Novel Reactor and Green Chemical Technology of Hubei Province, School of Chemical Engineering and Pharmacy, Wuhan Institute of Technology, Wuhan City, Hubei Province, China. E-mail: pingli@wit.edu.cn, lyurenliang@wit.edu.cn
- Engineering Research Centre of Phosphorus Resource Development and Utilization of Ministry of Education, Wuhan Institute of Technology, Wuhan City, Hubei Province, China.
- Hubei Three Gorges Laboratory, Yichang City, Hubei Province, China.

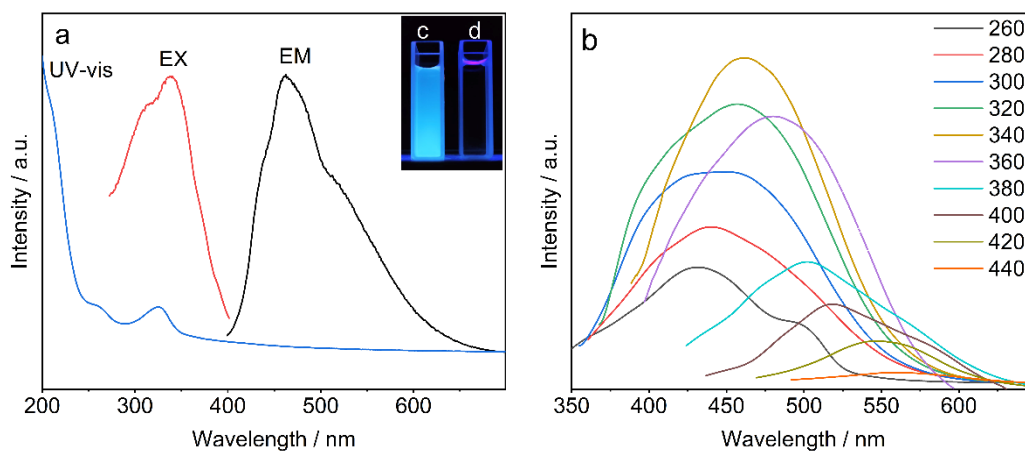

**Figure S1.** Optical characterization of g-CNQDs (a) UV-Vis absorption spectra and fluorescence excitation (Ex) or emission (Em) spectra, (b) Fluorescence emission spectra excited by different excitation light. Inset: fluorogram under 365 nm UV light, (c) the g-CNQDs, (d) the water.

**Table S1.** The fluorescence emission of g-CNQDs under different excitation.

| Excited wavelength /nm | Emission wavelength /nm | Excited wavelength /nm | Emission wavelength /nm |
|------------------------|-------------------------|------------------------|-------------------------|
| 260                    | 432                     | 360                    | 482                     |
| 280                    | 440                     | 380                    | 501                     |
| 300                    | 448                     | 400                    | 520                     |
| 320                    | 458                     | 420                    | 548                     |
| 340                    | 462                     | 440                    | 574                     |

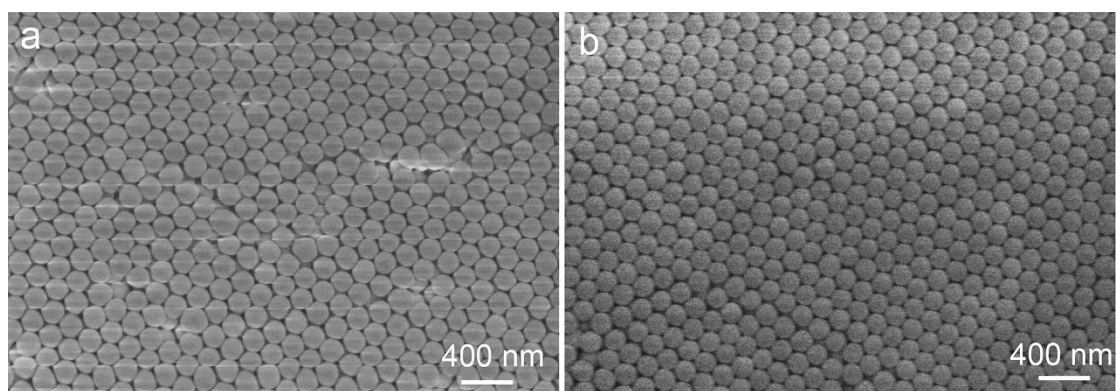

**Figure S2.** SEM of SiO<sub>2</sub> PCs self-assembled by SiO<sub>2</sub> microspheres with diameter of 225 nm before calcination (a) and after calcination (b).

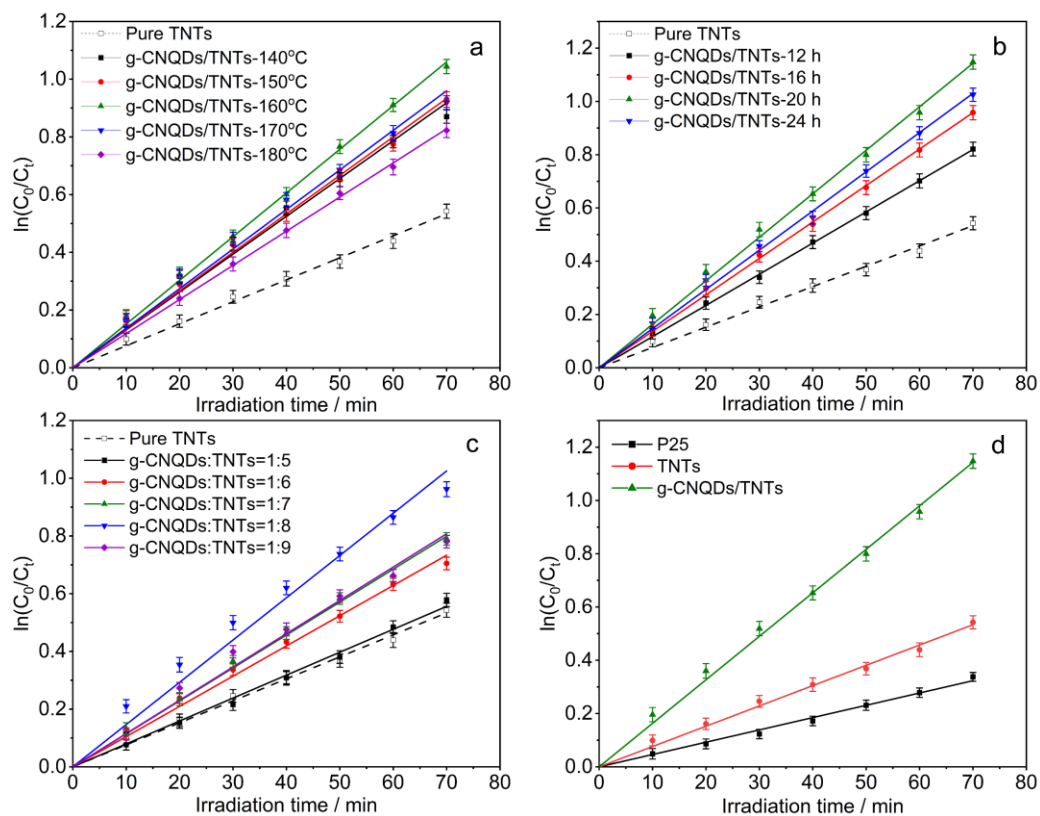

**Figure S3.** The effect of hydrothermal temperature (a), hydrothermal time (b), loading ratio of g-CNQDs/TNTs (c) on photocatalytic activity of g-CNQDs/TNTs and photodegradation kinetic curves (d) of P25, TNTs, and g-CNQDs/TNTs. The photodegradation data are expressed as the mean  $\pm$  standard deviation (experiments times n=3).
