# Supplementary figures and images for: Ternary-structured graphite carbon nitride quantum dots/TiO2 nanotubes/3D SiO2 photonic crystals for enhanced dye photodegradation
Source: Royal Society of Chemistry journal article supplement (doi:10.1039/d3nj00580a), 2023-01-01

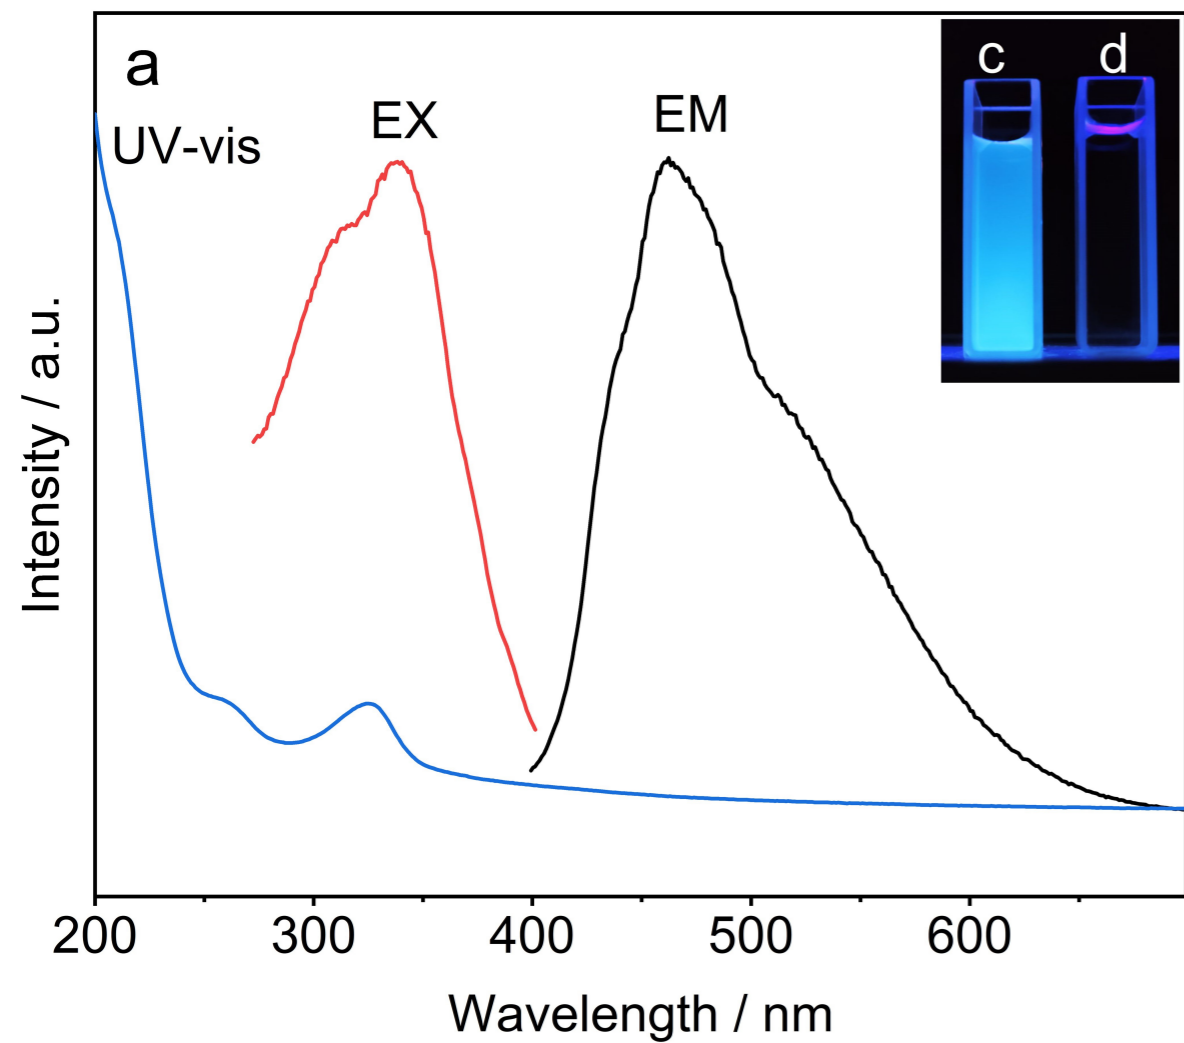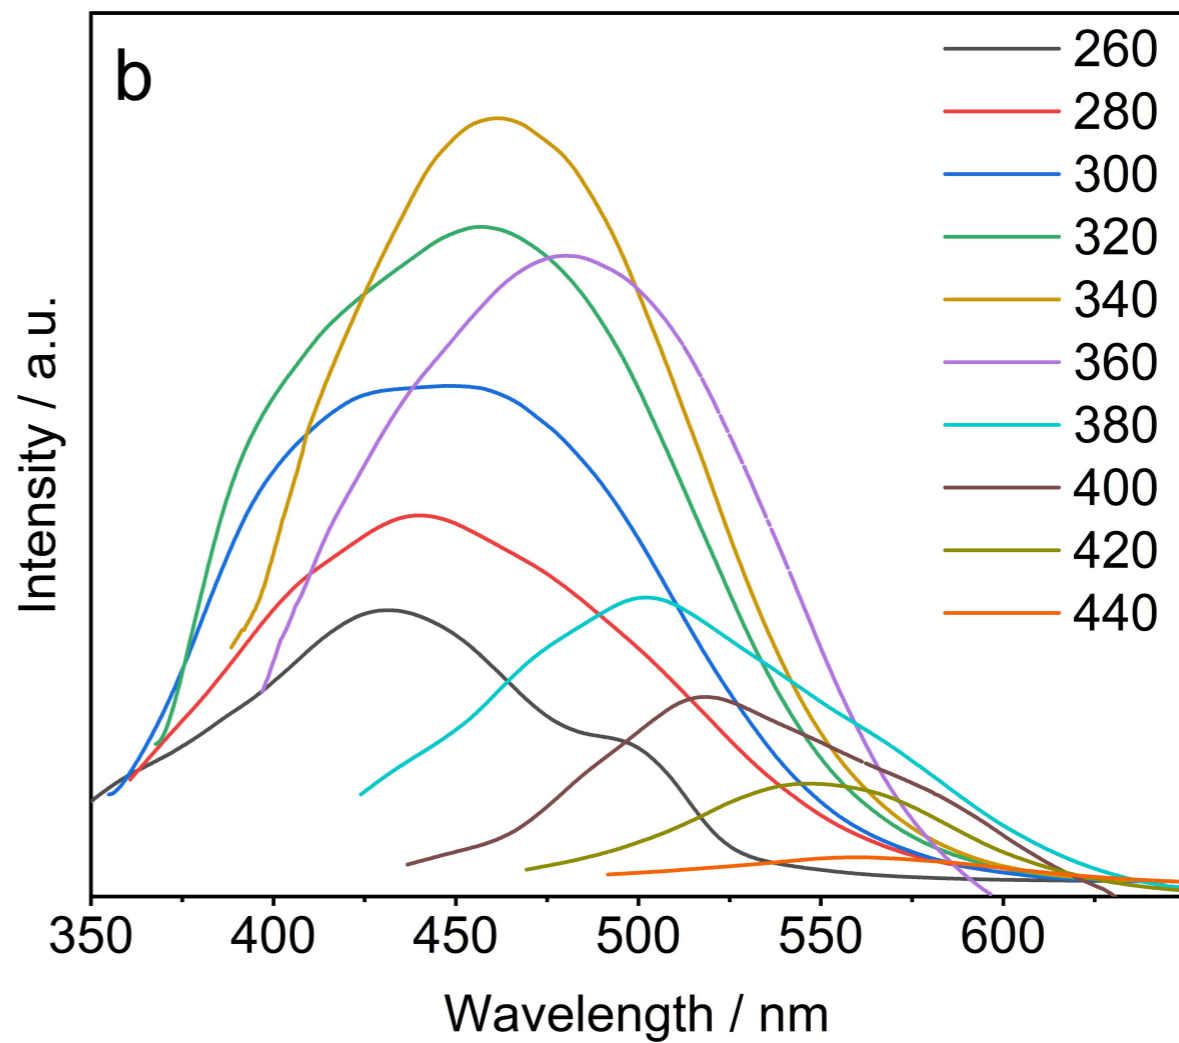

Supplement: d3nj00580a2.pdf [file d3nj00580a2.pdf]

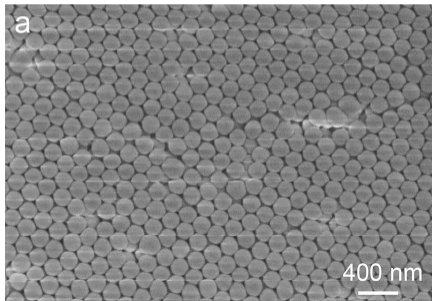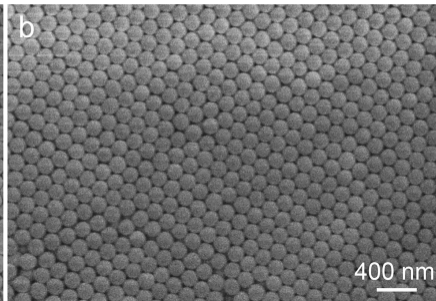

Supplement: d3nj00580a3.pdf [file d3nj00580a3.pdf]

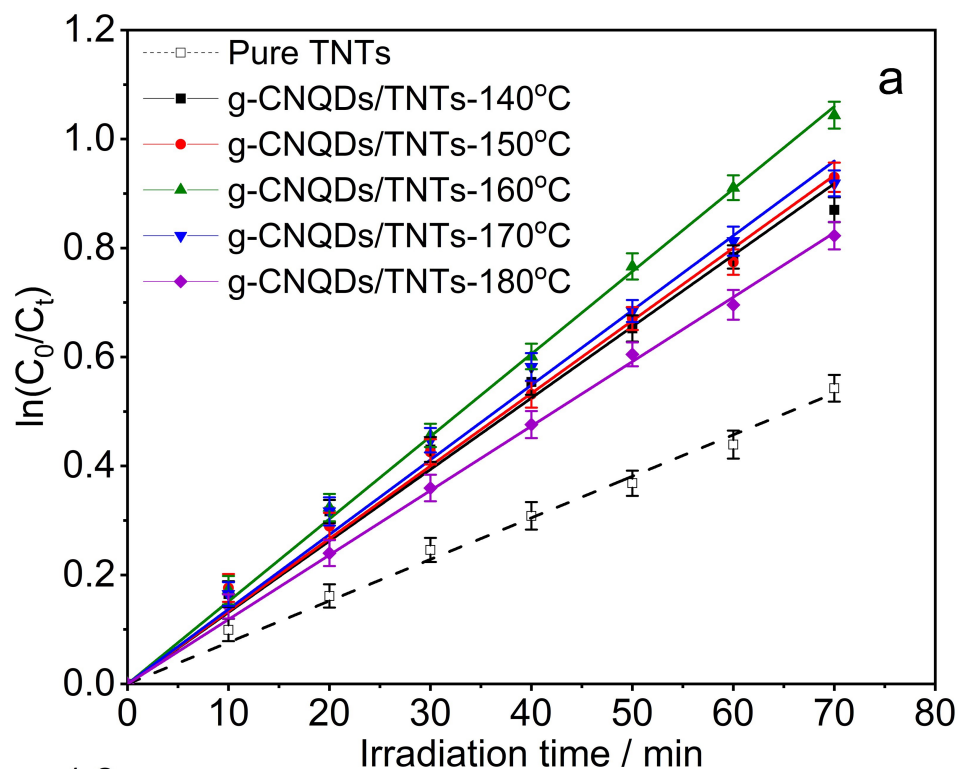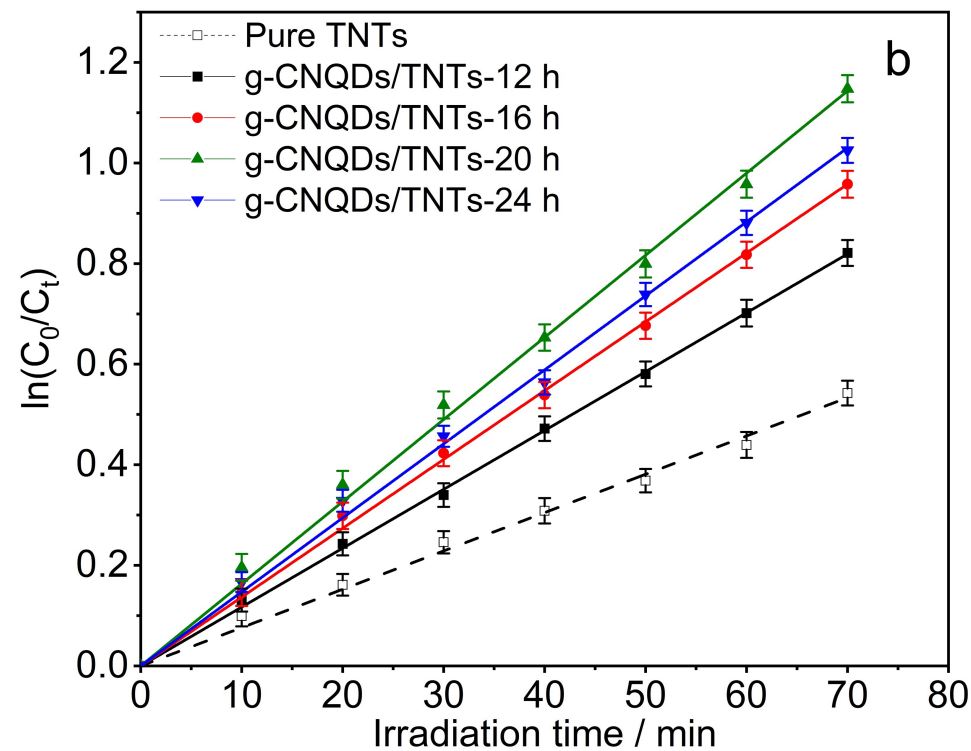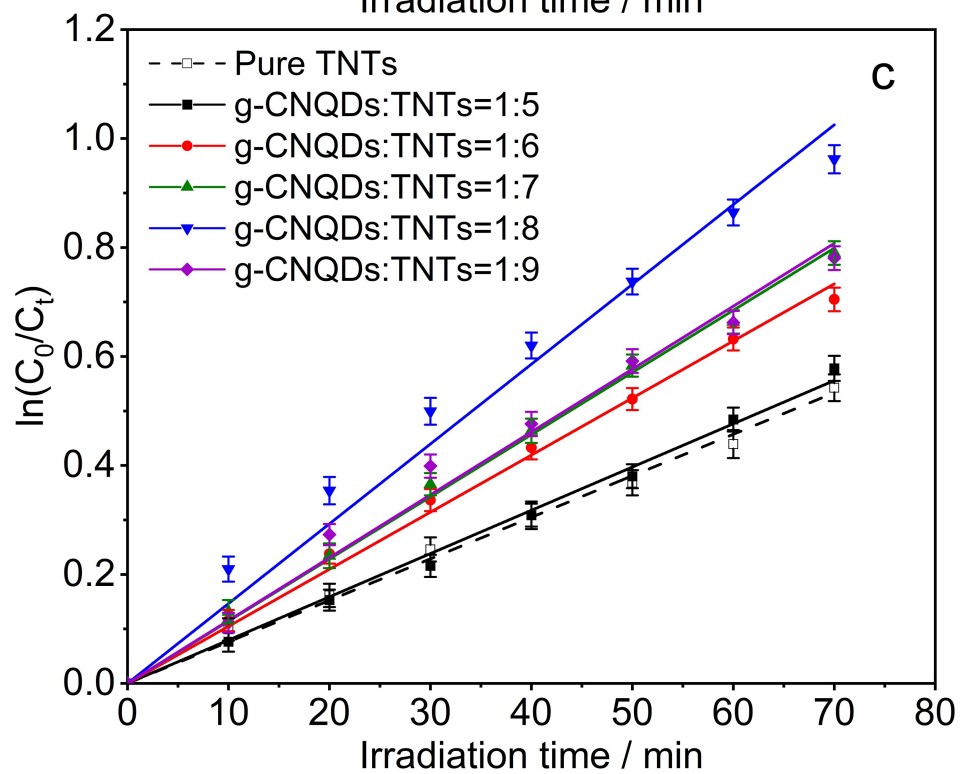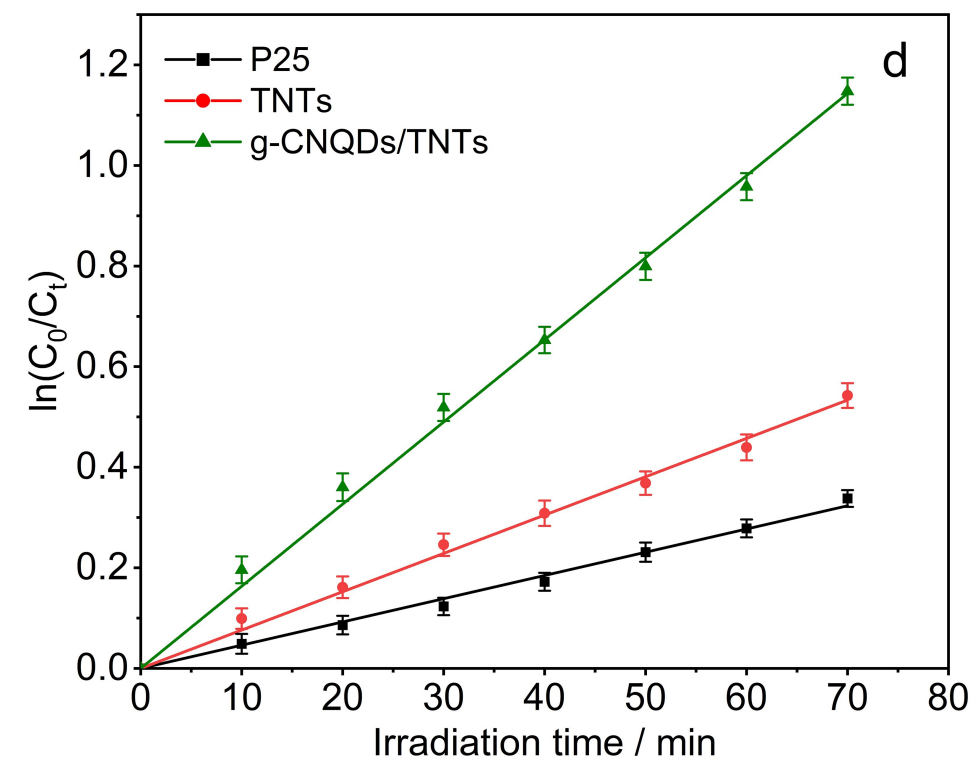

Supplement: d3nj00580a4.pdf [file d3nj00580a4.pdf]
